# Supplementary material for: Rational aspect ratio and suitable antibody coverage of gold nanorod for ultra-sensitive detection of a cancer biomarker
Source: Royal Society of Chemistry journal article supplement (doi:10.1039/c2lc20588b), 2012-01-01
Supplement: c2lc20588b.pdf [file c2lc20588b.pdf]

## Electronic supplementary information (ESI) for:

### Rational aspect ratio and suitable antibody coverage of gold nanorod for ultra-sensitive detection of a cancer biomarker

Phuoc Long Truong, Byung Woo Kim and Sang Jun Sim

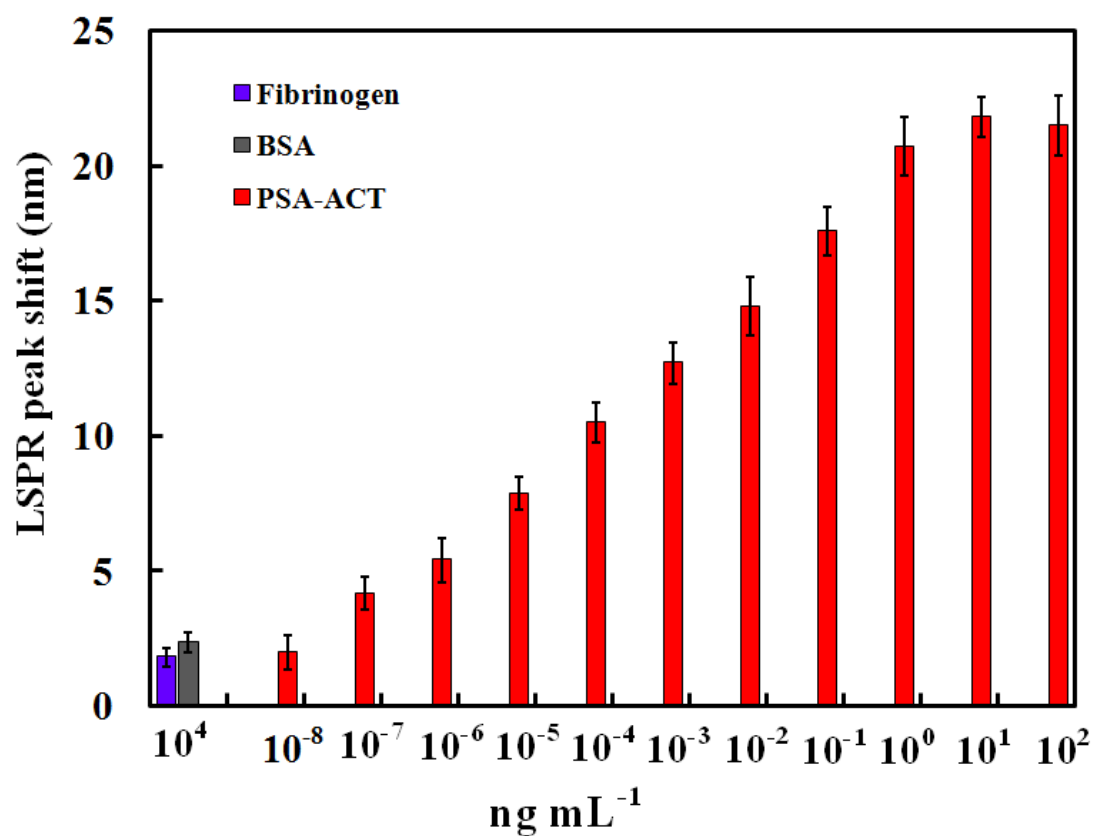

Fig. S1
